# Supplementary material for: Structural and dynamic properties of some aqueous salt solutions
Source: Royal Society of Chemistry journal article supplement (doi:10.1039/d0cp05331g), 2021-01-01
Supplement: d0cp05331g1.pdf [file d0cp05331g1.pdf]

## Structural and dynamic properties of some aqueous salt solutions

Olivera Drecun<sup>a)</sup>, Alberto Striolo<sup>a)\*</sup>, Cecilia Bernardini<sup>b)</sup>

<sup>a)</sup> Department of Chemical Engineering, University College London, UK.

<sup>b)</sup> Johnson Matthey Technology Centre, Blount's Ct, Sonning Common, Reading, UK.

### SUPPLEMENTARY INFORMATION

#### Contents

| Page number: |                                                                                                                                                                                                                                                         |
|--------------|---------------------------------------------------------------------------------------------------------------------------------------------------------------------------------------------------------------------------------------------------------|
| 2            | <b>Figure S1:</b> dynamic (self-diffusion, shear viscosity) and structural properties of water (radial distribution functions), as predicted by three commonly used water models: TIP3P <sup>1</sup> , SPC/E <sup>2</sup> and TIP4P/2005 <sup>3</sup> . |
| 3            | <b>Figure S2:</b> computed ion-ion RDFs in aqueous solution.                                                                                                                                                                                            |
| 4            | <b>Table S1:</b> Force field parameters implemented to describe ions, with references.                                                                                                                                                                  |
| 5            | <b>Table S2:</b> Example simulation results for water viscosity, with uncertainties, 12ns duration.                                                                                                                                                     |
| 5            | <b>Table S3:</b> Example simulation results for water viscosity, with uncertainties, 18ns duration.                                                                                                                                                     |
| 5            | <b>Table S4:</b> Example simulation results for water viscosity, with uncertainties, 22ns duration.                                                                                                                                                     |
| 6            | <b>Table S5:</b> Example simulation results for water self-diffusion, with uncertainties.                                                                                                                                                               |
| 6-8          | <b>FIGURES S3 – S6: ION-WATER RADIAL DISTRIBUTION FUNCTIONS, AT 26°C:</b>                                                                                                                                                                               |
| ➤ 6          | • <b>Fig.S3:</b> Ammonium acetate in aqueous solution: concentration $M=0.1$ to 1.                                                                                                                                                                      |
| ➤ 7          | • <b>Fig.S4:</b> Barium acetate in aqueous solution: concentration $M = 0.1$ to 1.                                                                                                                                                                      |
| ➤ 7          | • <b>Fig.S5.</b> Sodium chloride in aqueous solution: concentration $M = 0.1$ to 1.                                                                                                                                                                     |
| ➤ 8          | • <b>Fig.S6.</b> Barium nitrate in aqueous solution: concentration $M = 0.1$ and 0.3.                                                                                                                                                                   |
| 8-9          | <b>Figure S7:</b> Jones-Dole plots and resulting B-coefficients calculated from experimental viscosity data of the present work.                                                                                                                        |
| 9            | <b>TABLE S6:</b> Approximate proportion of total water 'engaged' in first hydration shells of ions: 1M aqueous solutions.                                                                                                                               |

FIGURE S1.

Dynamic (self-diffusion, shear viscosity) and structural properties of water (radial distribution functions), as predicted by three commonly used water models: TIP3P, SPC/E and TIP4P/2005. Experimental data is shown for comparison<sup>4,5</sup>, with x-ray diffraction and Empirical Structural Refinement (EPSR) data for RDFs<sup>6</sup>.

| <i>DYNAMIC PROPERTIES</i>                              | EXPERIMENTAL (20°C) | TIP3P | SPC/E | TIP4P/2005 |
|--------------------------------------------------------|---------------------|-------|-------|------------|
| Self-diffusion constant ( $10^{-9}$ m <sup>2</sup> /s) | 2.025 <sup>4</sup>  | 3.94  | 2.22  | 1.94       |
| Shear viscosity ( $10^{-3}$ Pa s)                      | 1.0016 <sup>5</sup> | 0.48  | 0.77  | 0.93       |

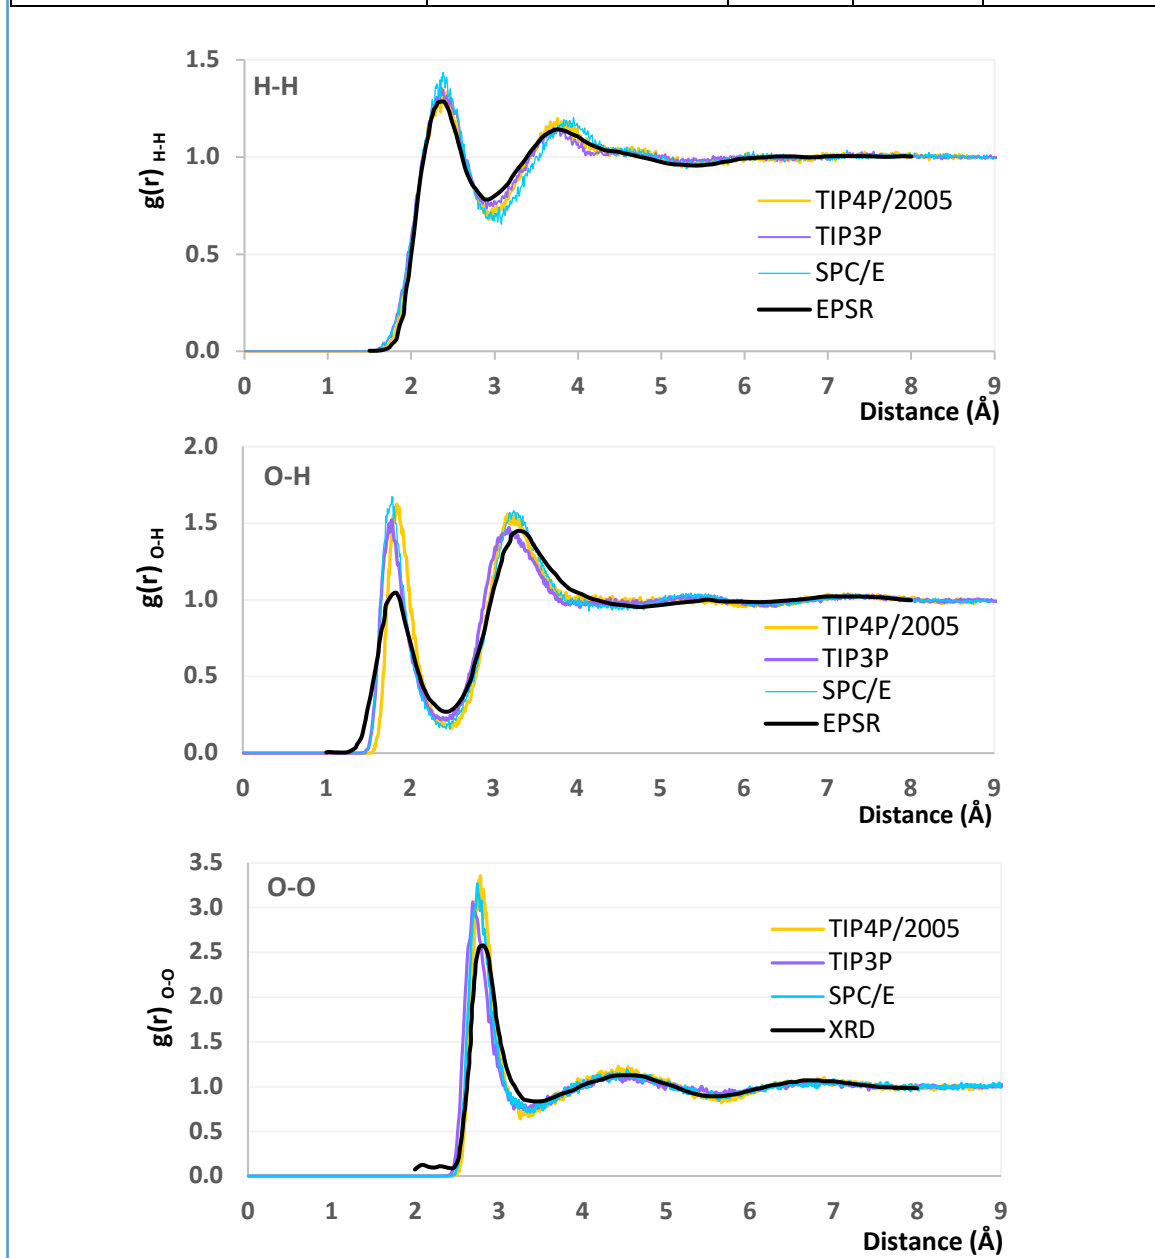

**FIGURE S2.**

Ion-ion RDFs in aqueous solution at the highest concentrations considered.  $T=26^{\circ}\text{C}$ .

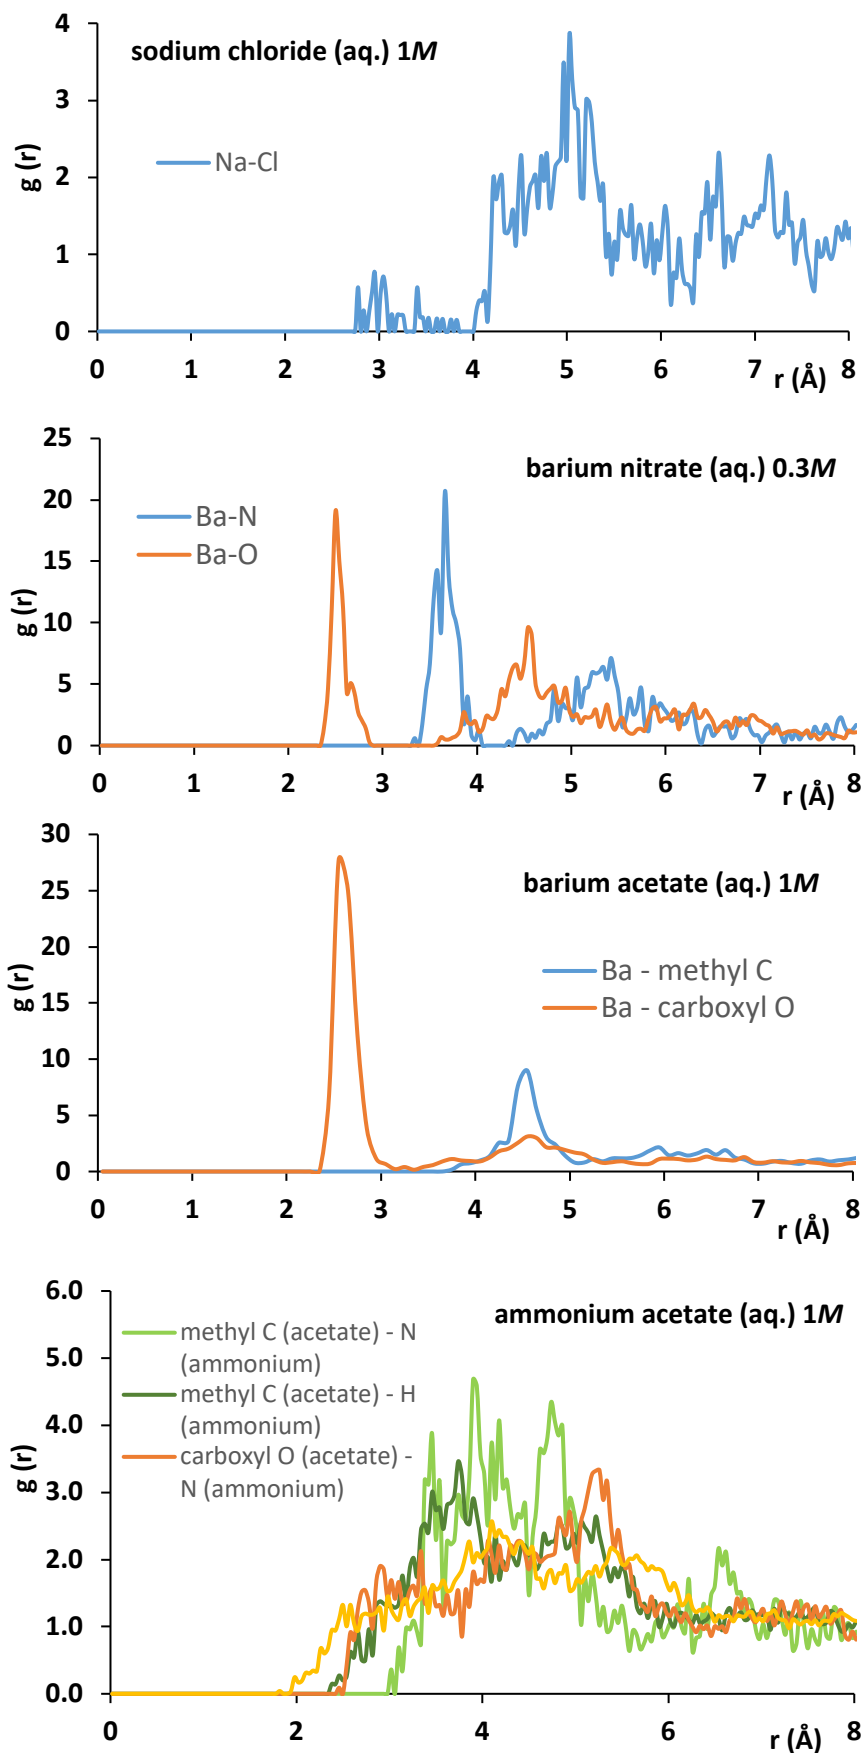

**TABLE S1.**

Force field parameters implemented to describe ions, with references.

| Parameters                                                                                                                                    | ION PAIRS:                                        |                    |                                                       |                      |                                    |                      |                            |                     |
|-----------------------------------------------------------------------------------------------------------------------------------------------|---------------------------------------------------|--------------------|-------------------------------------------------------|----------------------|------------------------------------|----------------------|----------------------------|---------------------|
|                                                                                                                                               | $\text{NH}_4^+, \text{C}_2\text{H}_3\text{O}_2^-$ |                    | $\text{Ba}^{2+}, 2(\text{C}_2\text{H}_3\text{O}_2^-)$ |                      | $\text{Ba}^{2+}, 2(\text{NO}_3^-)$ |                      | $\text{Na}^+, \text{Cl}^-$ |                     |
| $\epsilon$ (kcal/mol),<br>$\sigma$ (Å)                                                                                                        | N-N                                               | 0.1700,<br>3.25    | Ba-Ba                                                 | 0.017686424,<br>3.82 | Ba-Ba                              | 0.017686424,<br>3.82 | Na-Na                      | 0.3526418,<br>2.159 |
|                                                                                                                                               | H-H                                               | 0.0157,<br>1.06908 | CT-CT                                                 | 0.1094,<br>3.39967   | N-N                                | 0.17000478,<br>3.15  | Cl-Cl                      | 0.0127850,<br>4.830 |
|                                                                                                                                               | CT-CT                                             | 0.1094,<br>3.39967 | HC-HC                                                 | 0.0157,<br>2.64953   | O-O                                | 0.200,<br>2.85       |                            |                     |
|                                                                                                                                               | HC-HC                                             | 0.0157,<br>2.64953 | C-C                                                   | 0.0860,<br>3.39967   |                                    |                      |                            |                     |
|                                                                                                                                               | C-C                                               | 0.0860,<br>3.39967 | O-O                                                   | 0.2100,<br>2.95992   |                                    |                      |                            |                     |
|                                                                                                                                               | O-O                                               | 0.2100,<br>2.95992 |                                                       |                      |                                    |                      |                            |                     |
| <b>q (e)</b>                                                                                                                                  | N                                                 | -0.70686           | Ba                                                    | 2.00                 | Ba                                 | 2.00                 | Na                         | 1.00                |
|                                                                                                                                               | H                                                 | 0.426715           | CT                                                    | -0.2126              | N                                  | 1.118                | Cl                         | -1.00               |
|                                                                                                                                               | CT                                                | -0.2126            | HC                                                    | 0.003577             | O                                  | -0.706               |                            |                     |
|                                                                                                                                               | HC                                                | 0.003577           | C                                                     | 0.882473             |                                    |                      |                            |                     |
|                                                                                                                                               | C                                                 | 0.882473           | O                                                     | -0.840302            |                                    |                      |                            |                     |
|                                                                                                                                               | O                                                 | -0.840302          |                                                       |                      |                                    |                      |                            |                     |
| <b>Bond coefficients:</b><br>elastic constant (kcal mol <sup>-1</sup> /Å <sup>2</sup> ),<br>equilibrium bond length (Å)                       | N-H                                               | 3369.0,<br>1.033   | CT-H                                                  | 337.3,<br>1.0920     | N-O                                | 5000.0,<br>1.226     |                            |                     |
|                                                                                                                                               | CT-H                                              | 337.3,<br>1.0920   | CT-C                                                  | 328.3,<br>1.5080     |                                    |                      |                            |                     |
|                                                                                                                                               | CT-C                                              | 328.3,<br>1.5080   | C-O                                                   | 648.0,<br>1.2140     |                                    |                      |                            |                     |
|                                                                                                                                               | C-O                                               | 648.0,<br>1.2140   |                                                       |                      |                                    |                      |                            |                     |
| <b>Angle Coefficients:</b><br>$K$ (kcal/mol),<br>angle ( $\theta_0$ , in degrees)                                                             | H-N-H                                             | 40.52,<br>108.11   | H-CT-H                                                | 39.43,<br>108.35     | O-N-O                              | 500.0,<br>120.00     |                            |                     |
|                                                                                                                                               | H-CT-H                                            | 39.43,<br>108.35   | HC-CT-C                                               | 47.2,<br>109.68      |                                    |                      |                            |                     |
|                                                                                                                                               | HC-CT-C                                           | 47.2,<br>109.68    | CT-C-O                                                | 68.03,<br>123.11     |                                    |                      |                            |                     |
|                                                                                                                                               | CT-C-O                                            | 68.03,<br>123.11   |                                                       |                      |                                    |                      |                            |                     |
| <b>Dihedrals:</b><br>$K$ (kcal/mol),<br>$n$ (integer $\geq 0$ ),<br>$d$ (integer value of degrees),<br>weighting factor (1.0, 0.5, or<br>0.0) | HC-CT-C-O                                         | 1.60, 1, 0.0, 0.0  |                                                       | 1.60, 1, 0.0, 0.0    |                                    |                      |                            |                     |
|                                                                                                                                               | CT-O1-C-O2                                        | 0.16, 2, 180, 0.0  |                                                       | 0.16, 2, 180, 0.0    |                                    |                      |                            |                     |
| <b>References:</b>                                                                                                                            | <b>10</b>                                         |                    | <b>9, 10</b>                                          |                      | <b>9, 8</b>                        |                      | <b>7</b>                   |                     |

**Harmonic bond style potential:  $E = K (r - r_0)^2$**

$K$ : (energy/distance<sup>2</sup>)

$r_0$ : equilibrium bond distance

**Harmonic angle style potential:  $E = K (\theta - \theta_0)^2$**

$K$ : prefactor (energy)

$\theta_0$ : equilibrium angle value

**Charmm dihedral style potential:  $E = K [1 + \cos (n\phi - d)]$**

**TABLE S2.**

**Example simulation results for water viscosity, with uncertainties; 12ns duration. Pure water; 3 independent system configurations, SPC/E water model, 11089 water molecules, 20°C.**

The first 6ns of the simulations are dropped from analysis, with the remaining 6 ns used for production (the simulation is shown here split into time-blocks of 2ns). Viscosity values, computed every 500 fs, are averaged over the latter 6 ns to yield a mean value for each simulation production run. Prediction uncertainty is calculated as standard deviation from the mean average value of three production runs, and lies within 2%, for all salt types and concentrations considered.

| Configuration 1       |                   |                    | Configuration 2       |                   |                    | Configuration 3       |                   |                    | Average of 3 simulations |                   |                    |
|-----------------------|-------------------|--------------------|-----------------------|-------------------|--------------------|-----------------------|-------------------|--------------------|--------------------------|-------------------|--------------------|
| Time (ns)             | Viscosity [mPa s] | Standard deviation | Time (ns)             | Viscosity [mPa s] | Standard deviation | Time (ns)             | Viscosity [mPa s] | Standard deviation | Time (ns)                | Viscosity [mPa s] | Standard deviation |
| 0-2                   | 0.779             | 0.021              | 0-2                   | 0.777             | 0.016              | 0-2                   | 0.786             | 0.011              | 0-2                      | 0.781             | 0.005              |
| 2-4                   | 0.772             | 0.003              | 2-4                   | 0.769             | 0.001              | 2-4                   | 0.780             | 0.002              | 2-4                      | 0.773             | 0.006              |
| 4-6                   | 0.767             | 0.001              | 4-6                   | 0.770             | 0.002              | 4-6                   | 0.777             | 0.001              | 4-6                      | 0.771             | 0.005              |
| <b>6-8</b>            | 0.766             | 0.001              | <b>6-8</b>            | 0.764             | 0.001              | <b>6-8</b>            | 0.774             | 0.001              | <b>6-8</b>               | 0.768             | 0.005              |
| <b>8-10</b>           | 0.763             | 0.001              | <b>8-10</b>           | 0.764             | 0.000              | <b>8-10</b>           | 0.773             | 0.001              | <b>8-10</b>              | 0.767             | 0.006              |
| <b>10-12</b>          | 0.762             | 0.000              | <b>10-12</b>          | 0.764             | 0.000              | <b>10-12</b>          | 0.772             | 0.000              | <b>10-12</b>             | 0.766             | 0.005              |
| <b>Mean (6-12ns):</b> | <b>0.764</b>      | 0.002              | <b>Mean (6-12ns):</b> | <b>0.764</b>      | 0.001              | <b>Mean (6-12ns):</b> | <b>0.773</b>      | 0.001              | <b>Mean (6-12ns):</b>    | <b>0.767</b>      | 0.005              |

**TABLE S3.**

**Example simulation results for water viscosity; 18ns duration.** To test the reliability of predictions and adequacy of a 12 ns simulation run-time for obtaining equilibrated viscosity values, simulations for pure water were conducted to 18ns, starting from the same three independent initial system configurations.

| Configuration 1 |                   |                    | Configuration 2 |                   |                    | Configuration 3 |                   |                    | Average of 3 simulations |                   |                    |
|-----------------|-------------------|--------------------|-----------------|-------------------|--------------------|-----------------|-------------------|--------------------|--------------------------|-------------------|--------------------|
| Time (ns)       | Viscosity [mPa s] | Standard deviation | Time (ns)       | Viscosity [mPa s] | Standard deviation | Time (ns)       | Viscosity [mPa s] | Standard deviation | Time (ns)                | Viscosity [mPa s] | Standard deviation |
| 0-2             | 0.781             | 0.022              | 0-2             | 0.780             | 0.015              | 0-2             | 0.783             | 0.013              | 0-2                      | 0.781             | 0.002              |
| 2-4             | 0.769             | 0.001              | 2-4             | 0.782             | 0.002              | 2-4             | 0.769             | 0.002              | 2-4                      | 0.773             | 0.007              |
| 4-6             | 0.770             | 0.001              | 4-6             | 0.776             | 0.002              | 4-6             | 0.768             | 0.001              | 4-6                      | 0.771             | 0.005              |
| <b>6-8</b>      | 0.770             | 0.000              | <b>6-8</b>      | 0.771             | 0.002              | <b>6-8</b>      | 0.768             | 0.001              | <b>6-8</b>               | 0.770             | 0.002              |
| <b>8-10</b>     | 0.771             | 0.001              | <b>8-10</b>     | 0.768             | 0.000              | <b>8-10</b>     | 0.768             | 0.000              | <b>8-10</b>              | 0.769             | 0.002              |
| <b>10-12</b>    | 0.770             | 0.000              | <b>10-12</b>    | 0.767             | 0.000              | <b>10-12</b>    | 0.768             | 0.001              | <b>10-12</b>             | 0.768             | 0.002              |
| <b>12-14</b>    | 0.769             | 0.001              | <b>12-14</b>    | 0.767             | 0.000              | <b>12-14</b>    | 0.767             | 0.001              | <b>12-14</b>             | 0.768             | 0.001              |
| <b>14-16</b>    | 0.768             | 0.000              | <b>14-16</b>    | 0.767             | 0.000              | <b>14-16</b>    | 0.766             | 0.000              | <b>14-16</b>             | 0.767             | 0.001              |
| <b>16-18</b>    | 0.767             | 0.000              | <b>16-18</b>    | 0.767             | 0.000              | <b>16-18</b>    | 0.766             | 0.000              | <b>16-18</b>             | 0.767             | 0.001              |

**TABLE S4.**

**Example simulation results for water viscosity; 22ns duration.** A final simulation was conducted for 22 ns. Comparing results from Tables S2-S4, we conclude 12ns to be sufficient for obtaining equilibrated viscosity values; within the viscosity range of  $0.795 \pm 0.0473$  mPa s<sup>11</sup> reported for SPC/E water at 19.85°C (293K).

| Configuration 3 |                   |                    |
|-----------------|-------------------|--------------------|
| Time (ns)       | Viscosity [mPa s] | Standard deviation |
| 0-2             | 0.776             | 0.011              |
| 2-4             | 0.775             | 0.001              |
| 4-6             | 0.770             | 0.001              |
| <b>6-8</b>      | 0.772             | 0.001              |
| <b>8-10</b>     | 0.772             | 0.001              |
| <b>10-12</b>    | 0.772             | 0.001              |
| <b>12-14</b>    | 0.772             | 0.001              |
| <b>14-16</b>    | 0.771             | 0.000              |
| <b>16-18</b>    | 0.771             | 0.000              |
| <b>18-20</b>    | 0.770             | 0.000              |
| <b>20-22</b>    | 0.771             | 0.000              |

**TABLE S5.**

**Example simulation results for water self-diffusion, with uncertainties.**

Self-diffusion coefficients were obtained from three independent simulations of 4.5ns each; 1ns equilibration time and 3.5ns production. Mean-squared displacement (MSD) values were obtained utilising in-built LAMMPS code. Self-diffusion coefficients were subsequently obtained from the slope of MSD over time using the Einstein relation<sup>12</sup>. Uncertainty for diffusion coefficient results is calculated as the standard deviation from the mean average of three independent simulations per concentration for each salt type.

Example results for **water self-diffusion in 1M barium acetate aqueous solution**:

|                                       | Simulation 1 | Simulation 2 | Simulation 3 | Average of 3 simulations                                                                   |
|---------------------------------------|--------------|--------------|--------------|--------------------------------------------------------------------------------------------|
| $D$ ( $10^{-9}\text{m}^2/\text{s}$ ): | 1.54         | 1.57         | 1.52         | 1.54                                                                                       |
|                                       |              |              |              | Standard deviation: $2.41 \times 10^{-11}$<br>Expressed as a percentage of the mean: 1.56% |

**FIGURES S3 – S6: ION-WATER RADIAL DISTRIBUTION FUNCTIONS, AT 26°C.**

**FIGURE S3.** Ammonium acetate in aqueous solution: ion-water RDFs, concentration  $M=0.1$  to 1. Simulation results from literature, obtained using MD with SPC/E water for the acetate ion<sup>13</sup> and Monte-Carlo (MC) methods with SPC/E for both acetate and ammonium ions<sup>14</sup>, are shown alongside for comparison. Reference atoms for the acetate ion are carboxylate group oxygens and methyl group carbon.

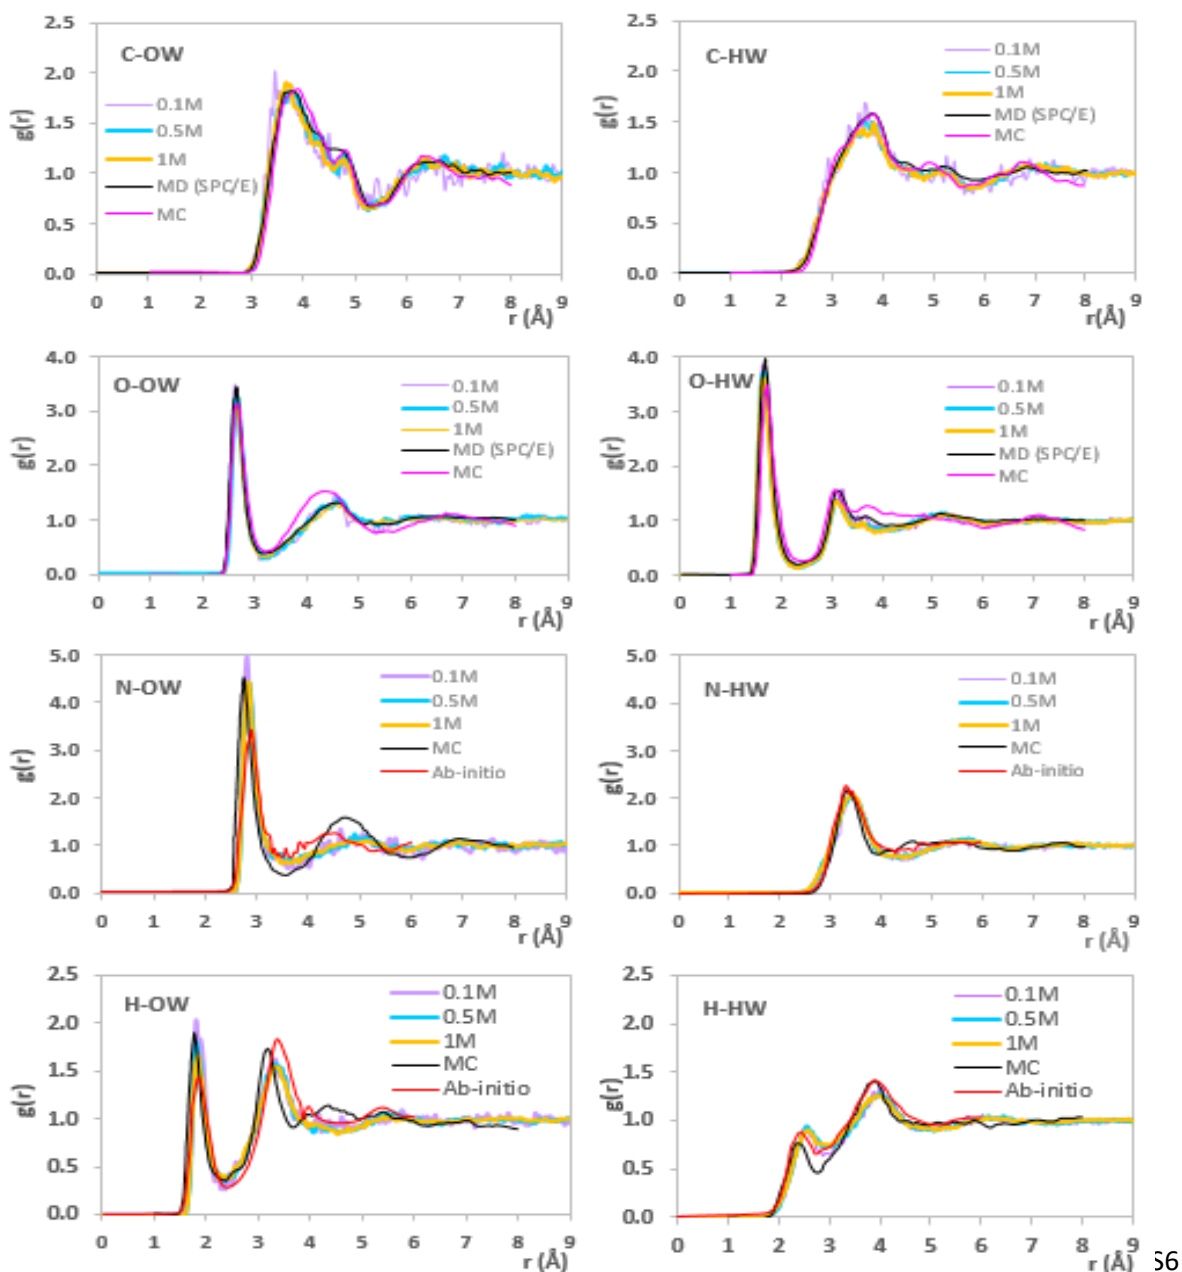

**FIGURE S4.** Barium acetate in aqueous solution: ion-water RDFs, concentration  $M = 0.1$  to  $1$ :

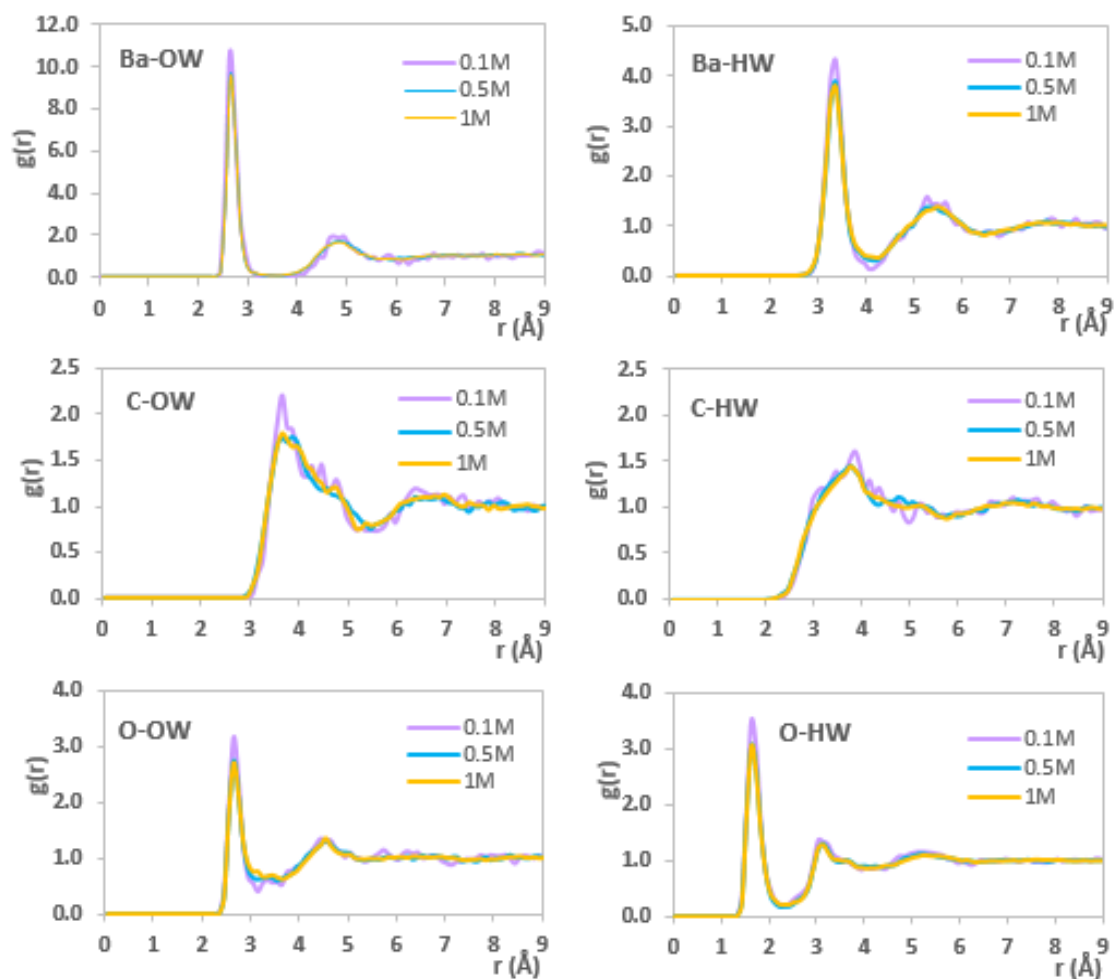

**FIGURE S5.** Sodium chloride in aqueous solution: ion-water RDFs, concentration  $M = 0.1$  to  $1$ . Literature results, from the Empirical Structural Refinement (EPSR) approach<sup>15</sup> and MD simulations with SPC/E water and Joung-Cheatham ion parameters (24.85°C,  $M = 1.3877$ )<sup>15</sup>, are shown for comparison.

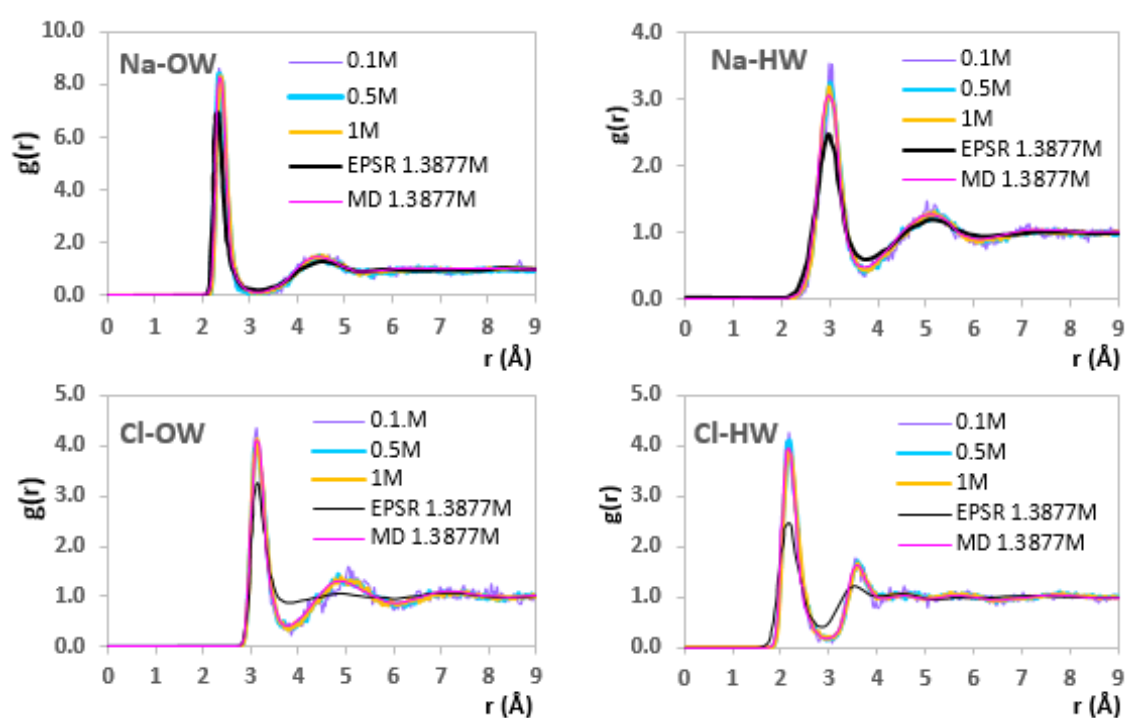

**FIGURE S6.** Barium nitrate in aqueous solution: ion-water RDFs, at  $M = 0.1$  and  $0.3$ . Literature data for the nitrate ion, shown for comparison: aqueous (SPC/E) potassium nitrate solution at  $26.85^\circ\text{C}$ ,  $0.102\text{ M}$ <sup>16</sup>.

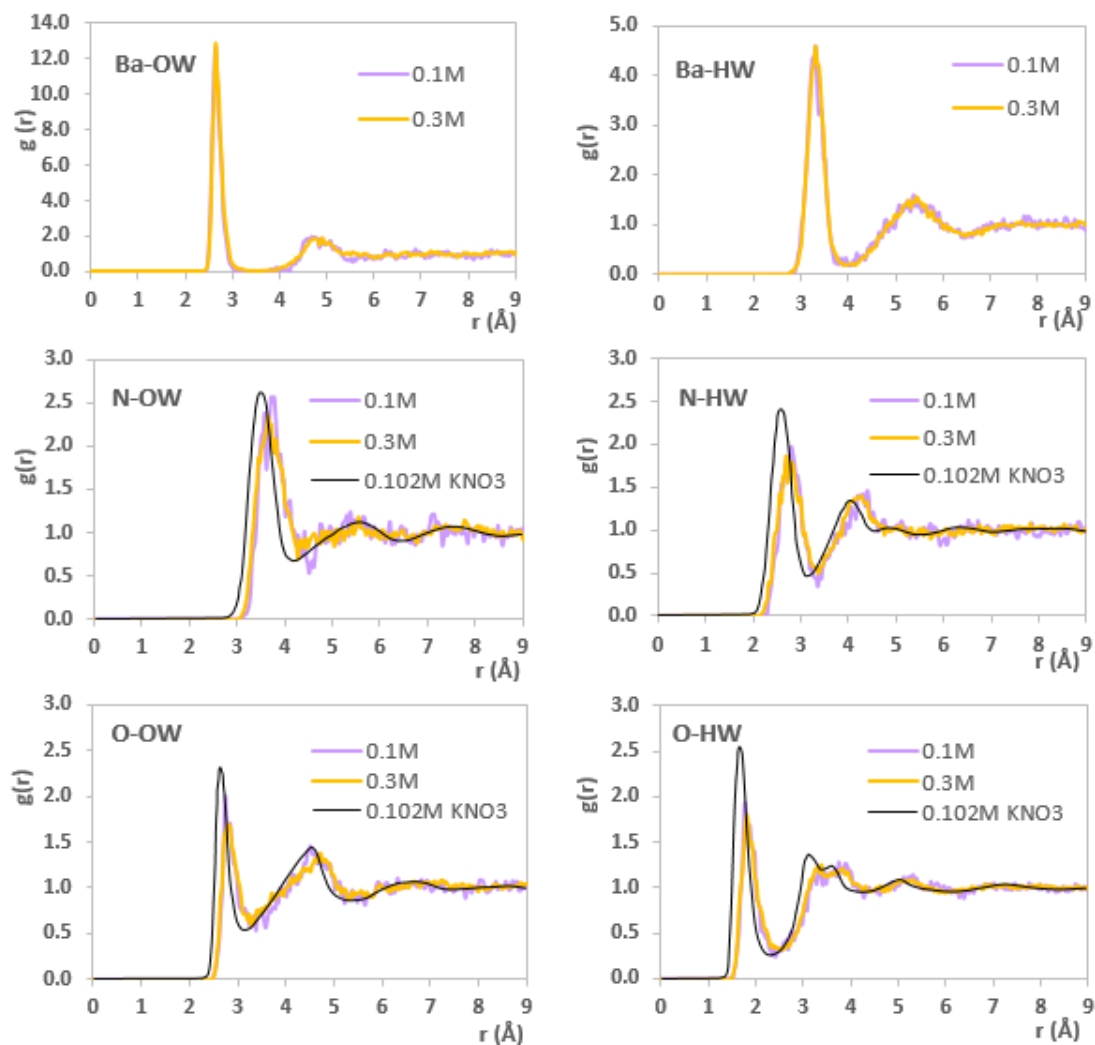

**FIGURE S7:**

Jones-Dole plots and resulting B-coefficients calculated from experimental viscosity data obtained in the present work (reported in main text). Values are assumed to be additive, and should be viewed tentatively due to the limited number of sample concentrations, but are presented here for readers that may be interested.

- In very dilute solutions (experimental data concentration range: 0.005 to 1 molal) forces are proportional to the square root of electrolyte concentration, hence the expression for **fluidity** (original Jones-Dole expression)<sup>17</sup>) in the form:

$$\varphi = 1 + A\sqrt{c} + Bc$$

implemented by subsequent authors<sup>18</sup>) to express **relative viscosity** ( $\eta_r = \eta/\eta_0$ ).

**A**: accounts for long range electrostatic/Coulombic interactions, dominating at dilute regimes

**B**: adjustable, additive parameter related to ion size and proportional to partial molar entropies of the ions, accounting for non-electrostatic interactions that emerge at higher salt concentrations (>0.1M).



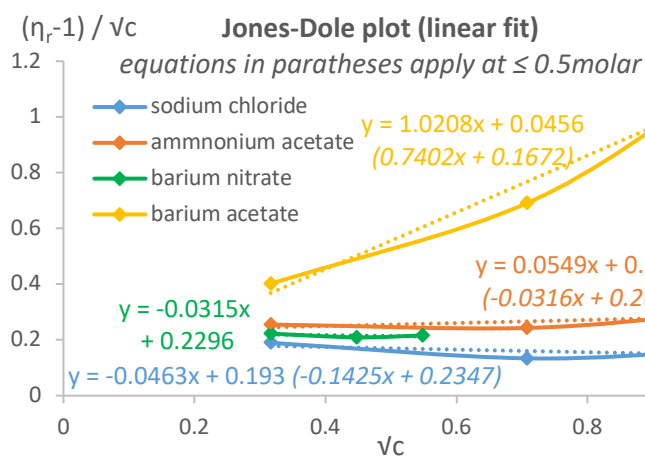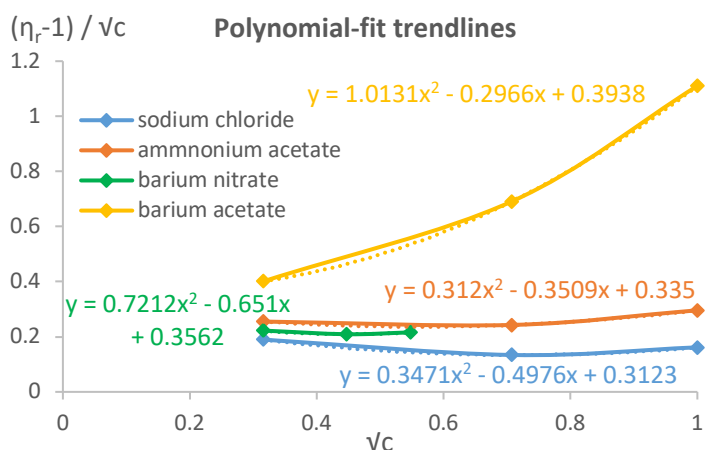

| SALT:            | <i>B</i><br>(concentrations $\leq 1$<br>molar), 26°C | <i>B</i><br>(concentrations $\leq 0.5$<br>molar), 26 °C | <i>B</i><br>Compiled from (Table 3 of ref.17):<br>'selected' values, at 25°C |
|------------------|------------------------------------------------------|---------------------------------------------------------|------------------------------------------------------------------------------|
| Barium acetate   | 1.0208                                               | 0.7402                                                  | 0.708                                                                        |
| Barium nitrate   | -0.0315                                              | -0.0315                                                 | 0.13                                                                         |
| Ammonium acetate | 0.0549                                               | -0.0316                                                 | 0.238                                                                        |
| Sodium chloride  | -0.0463                                              | -0.1425                                                 | 0.08                                                                         |

TABLE S6.

Approximate proportion of total water 'engaged' in first hydration shells of ions: 1M aqueous solutions.

Water molecules: 11089. Number of ions shown at 1 molar concentration, with exception of barium nitrate (0.3 molar). Coordination numbers taken from Table 5 (in main text, with references).

| SALT:            | Number of ions in the system                                                                   | (First shell) ion coordination number                                                       | Proportion of total water 'engaged' |
|------------------|------------------------------------------------------------------------------------------------|---------------------------------------------------------------------------------------------|-------------------------------------|
| Sodium chloride  | (Na) <sup>+</sup> → 200<br>(Cl) <sup>-</sup> → 200                                             | (Na) <sup>+</sup> → 5<br>(Cl) <sup>-</sup> → 6                                              | 2200/11089 → ~20%                   |
| Ammonium acetate | (NH <sub>4</sub> ) <sup>+</sup> → 200<br>(CH <sub>3</sub> CO <sub>2</sub> ) <sup>-</sup> → 200 | (NH <sub>4</sub> ) <sup>+</sup> → 5<br>(CH <sub>3</sub> CO <sub>2</sub> ) <sup>-</sup> → 16 | 4200/11089 → ~38%                   |
| Barium acetate   | Ba <sup>2+</sup> → 200<br>(CH <sub>3</sub> CO <sub>2</sub> ) <sup>-</sup> → 400                | Ba <sup>2+</sup> → 8<br>(CH <sub>3</sub> CO <sub>2</sub> ) <sup>-</sup> → 16                | 8000/11089 → ~72%                   |
| Barium nitrate   | Ba <sup>2+</sup> → 70<br>(NO <sub>3</sub> ) <sup>-</sup> → 140                                 | Ba <sup>2+</sup> → 8<br>(NO <sub>3</sub> ) <sup>-</sup> → 21                                | 4200/11089 → ~32%                   |

## REFERENCES:

- 1) Jorgensen W.L., Chandrasekhar J., Madura J.D., Impey R.W., Klein M.L. Comparison of simple potential functions for simulating liquid water. *J. Chem. Phys.* **1983**, 79(2): 926–935.
- 2) Berendsen, H.J.C., Grigera, J.R., Straatsma, T.P. The missing term in effective pair potentials. *J. Phys. Chem.* 1987, 91(24), 6269-6271.
- 3) Abascal, J. L. F., Vega, C. A general purpose model for the condensed phases of water: TIP4P/2005. *J. Chem. Phys.* **2005**, 123, 234505.
- 4) Holz, M., Heil, S.R., Sacco, A. Temperature-dependent self-diffusion coefficients of water and six selected molecular liquids for calibration in accurate 1H NMRPFG measurements. *Phys. Chem. Chem. Phys.* **2000**, 2(20), 4740-4742.
- 5) Anton Paar. *Viscosity of Water*. Available from: <https://wiki.anton-paar.com/uk-en/water/> [Accessed: 10th May 2020]
- 6) Wikfeldt, K.T., Batista, E.R., Vila, F.D., Jónsson, H. A transferable H<sub>2</sub>O interaction potential based on a single center multipole expansion: SCME. *Phys. Chem. Chem. Phys.* **2013**, 15(39), 16542-16556.
- 7) Joung, I.S., Cheatham, T.E. Determination of alkali and halide monovalent ion parameters for use in explicitly solvated biomolecular simulations. *J. Phys. Chem. B.* **2008**, 112(30), 9020-9041.
- 8) Krienke, H., Opalka, D. Hydration of molecular ions: a molecular dynamics study with a SPC/E water model. *J. Phys. Chem. C.* **2007**, 111(43), 15935-15941.
- 9) Mamatkulov, S., Fyta, M., Netz, R.R. Force fields for divalent cations based on single-ion and ion-pair properties. **2013**, *J. Chem. Phys.* 138, 024505.
- 10) Kashefolgheta, S., Verde, A.V. Developing force fields when experimental data is sparse: AMBER/GAFF-compatible parameters for inorganic and alkyl oxoanions. **2017**, *Phys. Chem. Chem. Phys.* 19(31), 20593-20607.
- 11) Markesteijn, A. P., Hartkamp, R., Luding, S., Westerweel, J. A comparison of the value of viscosity for several water models using Poiseuille flow in a nano-channel. **2012**, *J. Chem. Phys.* 136, 134104.
- 12) Einstein, A. Über die von der molekularkinetischen Theorie der Wärme geforderte Bewegung von in ruhenden Flüssigkeiten suspendierten Teilchen. *Annalen der Physik.* **1905**, 17, 549-560. Available at: <https://einstein-annalen.mpiwg-berlin.mpg.de/annalen/chronological/1905> (German), [http://www.maths.usyd.edu.au/u/UG/SM/MATH3075/r/Einstein\\_1905.pdf](http://www.maths.usyd.edu.au/u/UG/SM/MATH3075/r/Einstein_1905.pdf) (English; Dover Publications Inc., 1956). [Accessed: 4th May 2020]
- 13) Meng, E.C., Kollman, P.A. Molecular Dynamics Studies of the Properties of Water around Simple Organic Solutes. *J. Phys. Chem.* **1996**, 100(27), 11460-11470.
- 14) Jorgensen, W.L., Gao, J. Monte Carlo Simulations of the Hydration of Ammonium and Carboxylate Ions. *J. Phys. Chem.* **1986**, 90(10), 2174-2182.
- 15) Joung, S., Luchko, T., Case, D.A. Simple electrolyte solutions: Comparison of DRISM and molecular dynamics results for alkali halide solutions. *J. Chem. Phys.* **2013**, 138(4), 044103.
- 16) Banerjee, P., Yashonath, S., Bagchi, B. Coupled jump rotational dynamics in aqueous nitrate solutions. *J. Chem. Phys.* **2016**, 145(23), 234502.
- 17) Jones, G., Dole, M. The viscosity of aqueous solutions of strong electrolytes with special reference to barium chloride. *J. Am. Chem. Soc.* **1929**, 51 (10): 2950–2964.
- 18) Jenkins, H., Donald B., Marcus, Y. Viscosity B-Coefficients of Ions in Solution. *Chem. Rev.* **1995**, 95 (8): 2695–2724.
