# Supplementary material for: Structural and dynamic properties of some aqueous salt solutions
Source: Royal Society of Chemistry journal article supplement (doi:10.1039/d0cp05331g), 2021-01-01
Supplement: d0cp05331g2.xlsx [file d0cp05331g2.xlsx]

## Sheet: viscosity
NORMALIZED VALUES															ABSOLUTE (MEAN AVERAGES OF THREE) VISCOSITY VALUES
Ammonium acetate			Barium acetate			Barium nitrate			Sodium chloride			NaCl Ozbek1977, experimental@25ºC			Ammonium acetate			Barium acetate			Barium nitrate			Sodium chloride
Molarity	Sim	Exp	Molarity	Sim	Exp	Molarity	Sim	Exp	Molarity	Sim	Exp	mPa s	normalized		Molarity	Sim	Exp	Molarity	Sim	Exp	Molarity	Sim	Exp	Molarity	Sim	Exp
0	1	1	0	1	1	0	1	1	0	1	1	0.89	1		0	0.688185	0.856713	0	0.688185	0.856713	0	0.688185	0.856713	0	0.688185	0.856713
0.1	1.02449	1.0807	0.1	1.08291	1.1269	0.1	1.04912	1.07033	0.1	1.02027	1.05996	0.8993	1.01045		0.1	0.705042	0.925854	0.1	0.745243	0.965429	0.1	0.721991	0.916966	0.1	0.702138	0.908082
0.5	1.14313	1.17174	0.5	1.52131	1.48833	0.2	1.10344	1.09358	0.5	1.1226	1.09469	0.9314	1.04652		0.5	0.786687	1.00385	0.5	1.04694	1.27507	0.2	0.759371	0.936884	0.5	0.772556	0.937838
1	1.3252	1.29613	1	2.19766	2.11029	0.3	1.19788	1.11827	1	1.25769	1.16169	0.9759	1.09652		1	0.911983	1.11041	1	1.51239	1.80791	0.3	0.824367	0.958038	1	0.865522	0.995237
															SIMULATION: min&max values from 3 simulations per concentration, absolute (mPa s)
																Ammonium acetate		barium acetate		sodium chloride			barium nitrate
															Molarity	min. value	max. value	min. value	max. value	min. value	max. value	Molarity	min. value	max. value
															0	0.685505	0.692148	0.685505	0.692148	0.685505	0.692148	0	0.685505	0.692148
															0.1	0.70147	0.709564	0.743183	0.746278	0.700292	0.704567	0.1	0.718559	0.723743
															0.5	0.782724	0.791812	1.04393	1.05053	0.77063	0.776237	0.2	0.757853	0.761424
															1	0.908095	0.915555	1.50383	1.52382	0.862492	0.867365	0.3	0.818989	0.82851
															Simulation results min&max values; normalized (relative to water mean value)
																Ammonium acetate		barium acetate		sodium chloride			barium nitrate
															Molarity	min. value	max. value	min. value	max. value	min. value	max. value	Molarity	min. value	max. value
															0	0.996106	1.00576	0.996106	1.00576	0.996106	1.00576	0	0.996106	1.00576
															0.1	1.0193	1.03107	1.07992	1.08441	1.01759	1.0238	0.1	1.04414	1.05167
															0.5	1.13737	1.15058	1.51693	1.52652	1.1198	1.12795	0.2	1.10123	1.10642
															1	1.31955	1.33039	2.18521	2.21426	1.25329	1.26037	0.3	1.19007	1.20391
																Converted to format for error bars:
																negative value	positive value	negative value	positive value	negative value	positive value		negative value	positive value
															0	0.00389412	0.00575783	0.00389412	0.00575783	0.00389412	0.00575783	0	0.00389412	0.00575783
															0.1	0.00519051	0.00657144	0.00299352	0.0015033	0.00268199	0.0035292	0.1	0.00498833	0.00254507
															0.5	0.00575861	0.0074472	0.0043834	0.00520921	0.00279938	0.00534935	0.2	0.00220552	0.00298389
															1	0.00564905	0.005191	0.0124423	0.0166007	0.00440193	0.00267862	0.3	0.00781413	0.00602052
															EXPERIMENTAL results min&max values; absolute (mPa s)
																Ammonium acetate		barium acetate		sodium chloride			barium nitrate
															Molarity	min. value	max. value	min. value	max. value	min. value	max. value	Molarity	min. value	max. value
															0	0.84482	0.867713	0.84482	0.867713	0.84482	0.867713	0	0.84482	0.867713
															0.1	0.919161	0.934831	0.96189	0.969228	0.907585	0.908624	0.1	0.913622	0.920931
															0.5	0.999593	1.00873	1.27377	1.27573	0.935769	0.941879	0.2	0.923424	0.951838
															1	1.10733	1.11441	1.80482	1.81297	0.982835	1.01967	0.3	0.954006	0.965838
															EXPERIMENTAL results min&max values; normalized (relative to water mean value)
																Ammonium acetate		barium acetate		sodium chloride			barium nitrate
															Molarity	min. value	max. value	min. value	max. value	min. value	max. value	Molarity	min. value	max. value
															0	0.986118	1.01284	0.986118	1.01284	0.986118	1.01284	0	0.986118	1.01284
															0.1	1.07289	1.09118	1.12277	1.13133	1.05938	1.06059	0.1	1.06643	1.07496
															0.5	1.16678	1.17744	1.4868	1.48909	1.09228	1.09941	0.2	1.07787	1.11103
															1	1.29254	1.3008	2.10668	2.1162	1.14722	1.19021	0.3	1.11356	1.12738
																Converted to format for error bars:
																negative value	positive value	negative value	positive value	negative value	positive value		negative value	positive value
															0	0.0138822	0.0128397	0.0138822	0.0128397	0.0138822	0.0128397	0	0.0138822	0.0128397
						Viscosity experiments					Viscosity simulations				0.1	0.00781235	0.0104785	0.00413019	0.0044351	0.000580189	0.000632585	0.1	0.00390342	0.00462724
					Experiment number:		st.dev within measurement (mPa s)	as a percentage of the mean viscosity value:		Simulation number:		st.dev within production run (mPa s)	as a percentage of the mean viscosity value:		0.5	0.00496393	0.00569638	0.00152657	0.000761243	0.00241608	0.00471602	0.2	0.0157108	0.0174557
					1	sodium chloride	0.000520953	0.0573685		1	sodium chloride	0.00219606	0.312768		1	0.00359183	0.00466706	0.00361005	0.00590616	0.0144757	0.0285136	0.3	0.00470655	0.00910398
					2		0.00349934	0.373128		2		0.00318929	0.412824
					3		0.0211561	2.12573		3		0.002644	0.305481
					1	ammonium acetate	0.000982199	0.106086		1	ammonium acetate	0.00413003	0.585786
					2		3.91908e-05	0.00390407		2		0.00465413	0.591612
					3		0.00362658	0.326598		3		0.00373996	0.410091
					1	barium acetate	0.00367597	0.38076		1	barium acetate	0.0017841	0.239398
					2		0.00113262	0.0888277		2		0.00333724	0.31876
					3		0.00441799	0.244369		3		0.0102962	0.68079
					1	barium nitrate	0.00369342	0.402787		1	barium nitrate	0.00297318	0.411802
					2		0.014266	1.5227		2		0.00184491	0.242953
					3		0.00675586	0.705177		3		0.00487895	0.591842

## Sheet: ErrorCalc_concentrationValues
50ml flask used for all solutions:			±	0.5	ml				CONCENTRATION VALUES: ERROR CALCULATIONS (mass unit: grams, volume unit: litres)
KERN ABT 120-4M analytical balance:			±	0.0001	g				50ml (flask volume) =	0.05	litres
									0.5ml (flask volume error) =	0.0005	litres
Salt masses, in grams; calculated amount to prepare concentration vs. actual amount weighed out:									Concentration = amount of substance/(molar mass * volume)
	0.1 molar		0.5 molar		1 molar
	calc.	actual	calc.	actual	calc.	actual				0.1		0.5		1
sodium chloride	0.2922	0.2923	1.461	1.4608	2.922	2.9222				min. value	max. value	min. value	max. value	min. value	max. value
ammonium acetate	0.3854	0.3865	1.9271	1.9275	3.8541	3.8564			sodium chloride	0.0990099	0.101079	0.494948	0.505016	0.990133	1.0102
barium acetate	1.2772	1.2771	6.38575	6.3868	12.7715	12.7735			ammonium acetate	0.0992636	0.101321	0.495136	0.505191	0.990658	1.01072
	0.1 molar		0.2 molar		0.3 molar				barium acetate	0.0989983	0.101014	0.495123	0.505141	0.990246	1.01027
	calc.	actual	calc.	actual	calc.	actual				0.1		0.2		0.3
barium nitrate	1.3067	1.3068	2.6134	2.6137	3.9201	3.9204				min. value	max. value	min. value	max. value	min. value	max. value
									barium nitrate	0.099011	0.101027	0.198037	0.202053	0.297048	0.303065
Molar masses (g/mol):
sodium chloride	58.44									% difference	% difference	% difference	% difference	% difference	% difference
ammonium acetate	77.0825								sodium chloride	-0.990099	1.07924	-1.01043	1.00319	-0.986711	1.02047
barium acetate	255.43								ammonium acetate	-0.736417	1.32132	-0.972759	1.03827	-0.934225	1.07235
barium nitrate	261.337								barium acetate	-1.00173	1.01406	-0.975369	1.02829	-0.975369	1.02671
									barium nitrate	-0.988962	1.02672	-0.981385	1.02672	-0.983911	1.02157
